# Supplementary material for: Time-resolved SANS reveals pore-forming peptides cause rapid lipid reorganization
Source: Royal Society of Chemistry journal article supplement (doi:10.1039/d0nj04717a), 2020-12-08
Supplement: d0nj04717a1.pdf [file d0nj04717a1.pdf]

**Supporting Information For:**

**Time-Resolved SANS Reveals Pore-Forming Peptides Cause  
Rapid Lipid Reorganization**

Michael H.L. Nguyen, Mitchell DiPasquale, Brett W. Rickeard, Caesar G. Yip, Kaity N. Greco,  
Elizabeth G. Kelley, and Drew Marquardt

### Dynamic Light Scattering (DLS)

| Condition of DMPC LUVs          |                    | LUV Diameter (nm) | % Polydispersity |
|---------------------------------|--------------------|-------------------|------------------|
| <b>Peptide-Free<sup>a</sup></b> |                    | 140.9 ± 9.9       | 14.1             |
| <b>h-LUVs<sup>a</sup></b>       |                    | 135.5 ± 8.5       | 12.6             |
| <b>d-LUVs<sup>a</sup></b>       |                    | 138.5 ± 8.5       | 12.3             |
| <b>Alamethicin</b>              | <b>P/L= 1/1000</b> | 146.9 ± 13.4      | 18.2             |
|                                 | <b>1/150</b>       | 137.3 ± 8.7       | 12.6             |
|                                 | <b>1/40</b>        | 148.1 ± 12.9      | 17.4             |
| <b>Melittin</b>                 | <b>1/1000</b>      | 136.0 ± 8.1       | 11.9             |
|                                 | <b>1/150</b>       | 143.6 ± 9.5       | 13.3             |
|                                 | <b>1/40</b>        | 131.8 ± 6.3       | 9.5              |

<sup>a</sup>Measured prior to methanolic peptide addition

**Table S1. Hydrodynamic diameter and Polydispersity (PD) of DMPC LUVs.** Samples were diluted 100-fold with H<sub>2</sub>O and measured at 30°C after temperature equilibration to ensure fluid phase bilayers. The lack of change in hydrodynamic diameter and PD after peptide incubation and small angle neutron scattering measurements (~72 hours after mixing) suggests a lack of vesicle fusion.

### Circular Dichroism (CD)

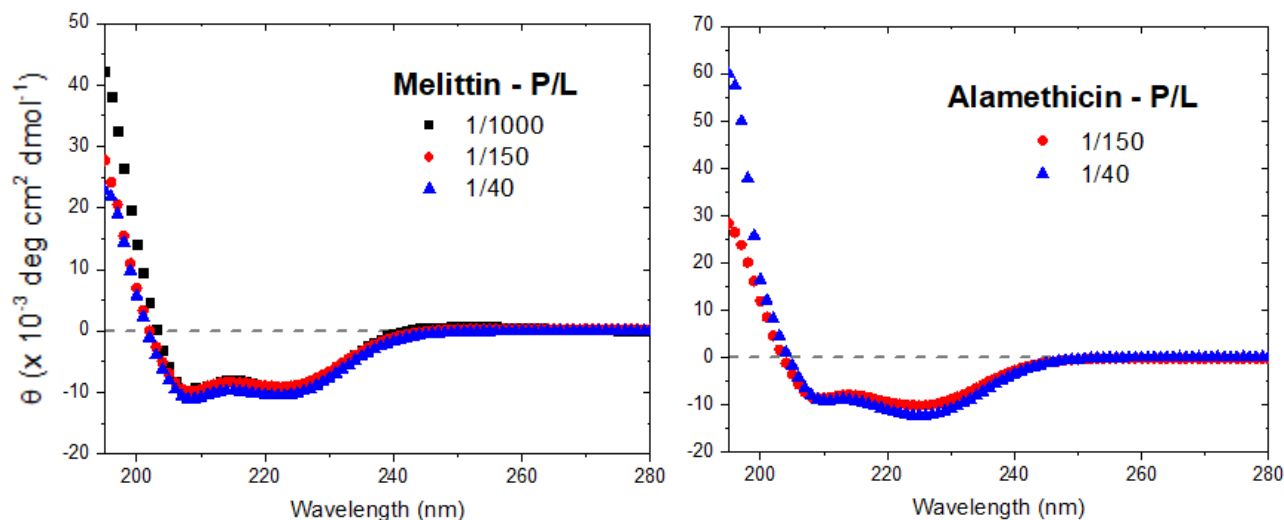

**Figure S1. Melittin (left) and alamethicin (right) CD spectra.** Data is displayed as mean residue ellipticity. Confirmation of peptide secondary structure after experimental conditions and measurements. CD Spectra show the typical  $\alpha$ -helical pattern demonstrated for melittin<sup>1</sup> and alamethicin<sup>2</sup> samples. Alamethicin at P/L = 1/1000 had a signal too low to measure.

## References

- [1] De Jongh, H. H. J., Goormaghtigh, E., Killian, J. A., De Jongh, H. H. J., Goormaghtigh, E., Killian, J. A., ... Goormaghtigh, E. (1994). Analysis of Circular Dichroism Spectra of Oriented Protein–Lipid Complexes: Toward a General Application. *Biochemistry*, 33(48), 14521–14528. <https://doi.org/10.1021/bi00252a019>.
- [2] Wu, Y., Huang, H. W., & Olah, G. A. (1990). Method of oriented circular dichroism. *Biophysical Journal*, 57(4), 797–806. [https://doi.org/10.1016/S0006-3495\(90\)82599-6](https://doi.org/10.1016/S0006-3495(90)82599-6)
